# Supplementary material for: A microcube-based hybrid piezocomposite as a flexible energy generator
Source: Royal Society of Chemistry journal article supplement (doi:10.1039/c7ra05605b), 2017-01-01
Supplement: c7ra05605b1.pdf [file c7ra05605b1.pdf]

## Electronic Supplementary Information

### Microcube-Based Hybrid Piezocomposite as Flexible Energy Generators

Yong Zhang,<sup>a,b</sup> Wanlin Zhu,<sup>c</sup> Chang Kyu Jeong,<sup>b</sup> Huajun Sun,<sup>a</sup> Guang Yang,<sup>b</sup> Wen Chen,<sup>\*a</sup> and Qing Wang<sup>\*b</sup>

<sup>a</sup> *State Key Laboratory of Advanced Technology for Materials Synthesis and Processing, School of Materials Science and Engineering, Wuhan University of Technology, Wuhan 430070, PR China. Email: chenw@whut.edu.cn*

<sup>b</sup> *Department of Materials Science and Engineering, The Pennsylvania State University, University Park, PA 16802, USA. Email: wang@matse.psu.edu*

<sup>c</sup> *School of Materials Science and Engineering, Shaanxi University of Science and Technology, Xi'an 710021, PR China*

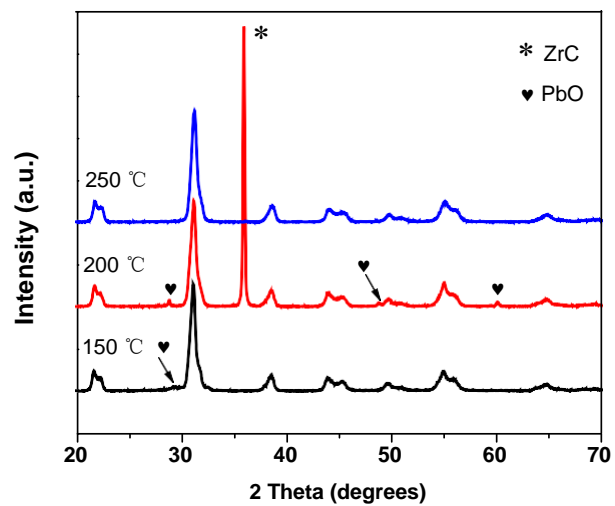

Fig. S1 The X-ray diffraction patterns of obtained products fabricated under various hydrothermal temperatures (150 – 250 °C).

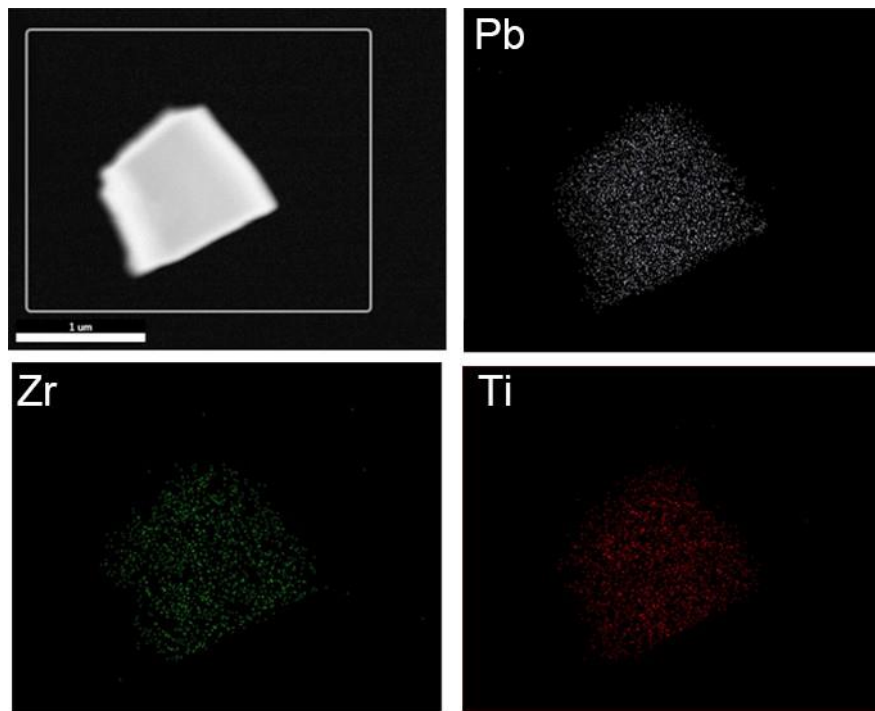

Fig. S2 The transmission electron microscopy (TEM) image and corresponding EDS mapping of synthesized PZT microcube particle.

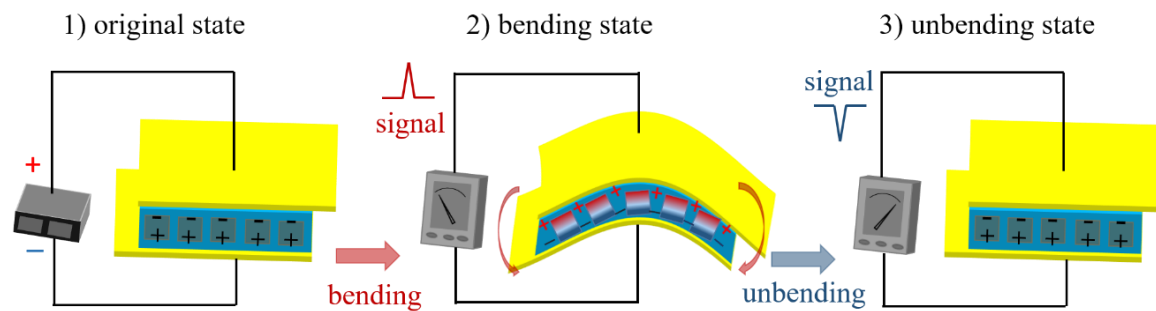

Fig. S3 Potential generation process of PEG under bending and releasing.
